# Supplementary material for: Edge-state-induced magnetism in two-dimensional hematene
Source: Royal Society of Chemistry journal article supplement (doi:10.1039/d2ta05056k), 2022-01-01
Supplement: d2ta05056k1.pdf [file d2ta05056k1.pdf]

## Electronic Supplementary Information for

### Edge-State-induced Magnetism in two-dimensional Hemitene

Junjie Shi, Weiwei Ren, Xiaoyan Ren, Yuanyuan Shang, Rui Pang,\*and Shunfang Li\*

*International Laboratory for Quantum Functional Materials of Henan, School of  
Physics  
and Microelectronics, Zhengzhou University, Zhengzhou 450001, People's Republic  
of China*

E-mail: pangrui@zzu.edu.cn; sflizzu@zzu.edu.cn

#### **This file includes:**

**Fig. S1** Stability analysis of the 2D hematene crystal. (a) Phonon spectrum; (b)-(d) Structural snapshots of 2D hematene crystal at time of 10 ps during AIMD simulation under the temperatures of 300, 900, and 1500 K, respectively.

**Fig. S2** Lattice constant as a function of the values of Hubbard  $U_{\text{eff}}$  in DFT+U calculations.

**(d)**

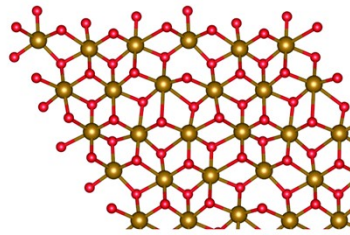

**Fig. S1** Stability analysis of the 2D hematene crystal. (a) Phonon spectrum; (b)-(d) Structural snapshots in both top and side views of the 2D hematene crystal at time of 10 ps during AIMD simulation under the temperatures of 300, 900, and 1500 K, respectively.

As shown in Fig. S1, from both the phonon calculation and the AIMD simulations, one can conclude that the present 1T structure is a real local minim. Particularly, the AIMD calculation demonstrate the thermodynamic stability of the 1T structure at fairly high temperatures.

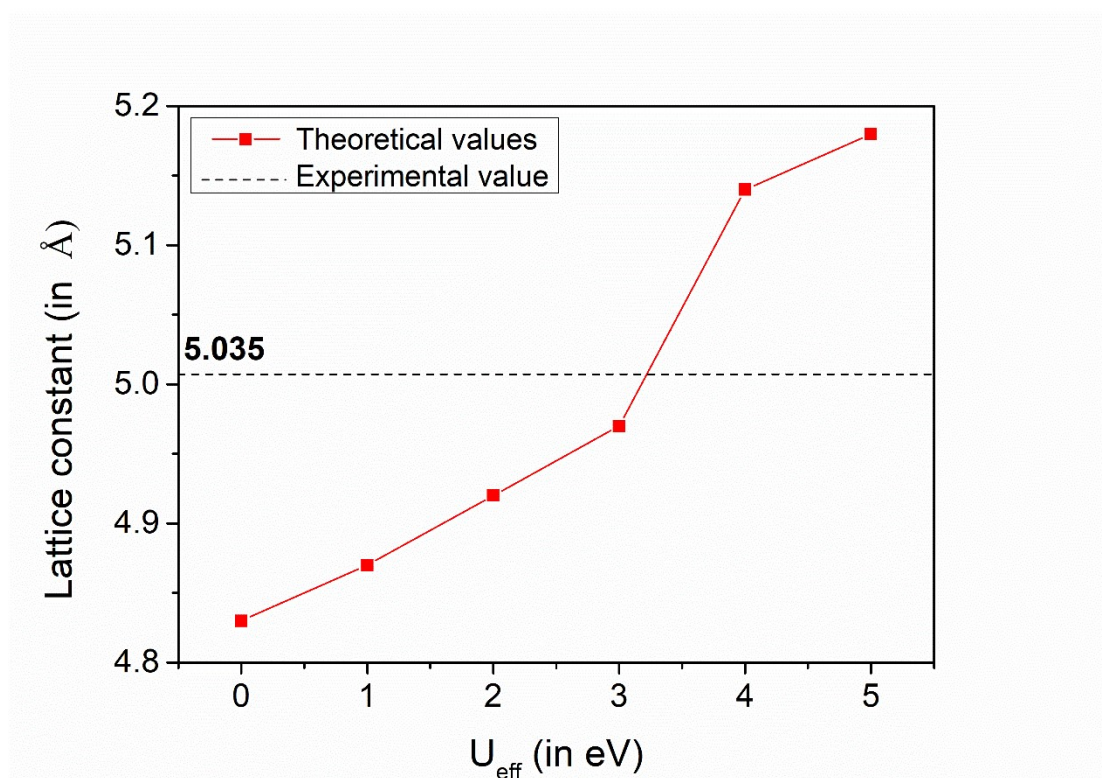

**Fig. S2** Lattice constant as a function of the values of Hubbard  $U_{\text{eff}}$  in DFT+U calculations.

Based on Fig. S2, one can see that the optimum  $U_{\text{eff}}=3$  eV is reasonably selected in the present calculations.
